# Supplementary material for: A self-powered ultraviolet photodetector based on TiO2/Ag/ZnS nanotubes with high stability and fast response
Source: Royal Society of Chemistry journal article supplement (doi:10.1039/c9tc05326c), 2019-12-05
Supplement: c9tc05326c1.pdf [file c9tc05326c1.pdf]

## Supporting Information

# Self-powered ultraviolet photodetector based on TiO<sub>2</sub>/Ag/ZnS nanotubes with high stability and fast response

Xiang Li,<sup>1a</sup> Shiyong Gao,<sup>1a,c</sup> Guangning Wang,<sup>c</sup> Zhikun Xu,<sup>c</sup> Shujie Jiao,<sup>\*a</sup> Dongjun Wang<sup>\*a</sup>, Yuewu Huang,<sup>a</sup> Dandan Sang,<sup>b</sup> Jinzhong Wang<sup>a</sup> and Yong Zhang<sup>a</sup>

<sup>a</sup>School of Materials Science and Engineering, Harbin Institute of Technology, Harbin 150001, China.

<sup>b</sup>School of Physical Science and Information Technology, Shandong Key Laboratory of Optical Communication Science and Technology, Liaocheng University, Liaocheng, 252059, China

<sup>c</sup>Key Laboratory for Photonic and Electric Bandgap Materials, Ministry of Education, Harbin Normal University, Harbin, 150025, China.

---

\* E-mail address: [shujiejiao@hit.edu.cn](mailto:shujiejiao@hit.edu.cn), [dongjunwang@hit.edu.cn](mailto:dongjunwang@hit.edu.cn)

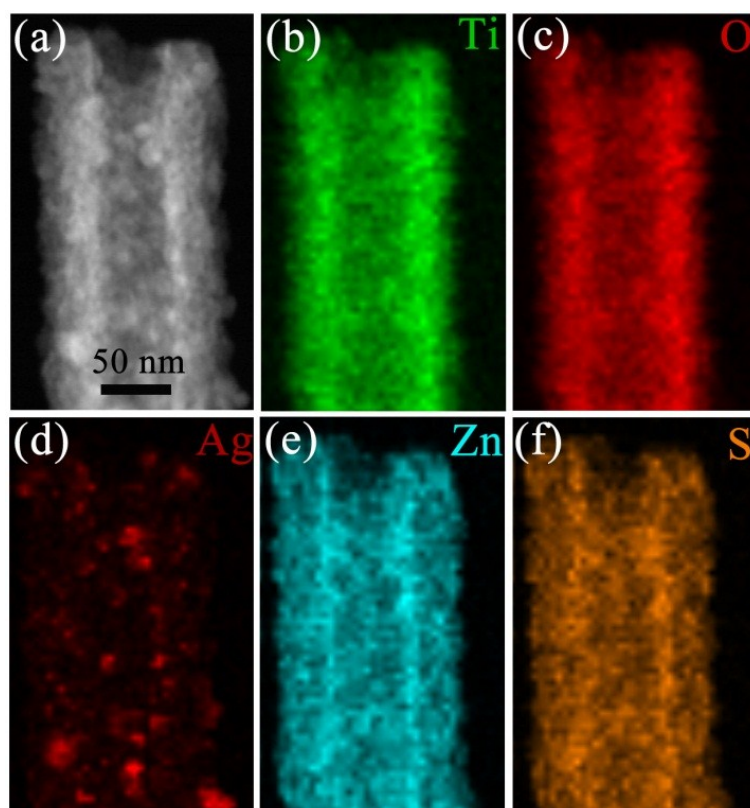

Fig. S1 (a) HAADF-STEM image of a  $\text{TiO}_2/\text{Ag}/\text{ZnS}$  nanotube and corresponding EDS mapping images for Ti (b), O (c), Ag (d), Zn (e) and S (f) of the same nanotube, respectively.
